# Supplementary material for: Elevation of α-1,3 fucosylation promotes binding ability of TNFR1 to TNF-α and contributes to osteoarthritic cartilage destruction and apoptosis
Source: Research Square preprint supplement (doi:10.21203/rs.3.rs-1328978/v1), 2022-02-09
Supplement: Supplementary file 4 [file d6b113fef3dfcc0916af3954.docx]

**Table S2. The sequence information of siRNA against FUT3, 8, 9 and 10.**

| Target gene | Location | Sequence (5′-3′) |
| --- | --- | --- |
| FUT3 | 1056 | Antisense: UUGAAGUAUCUGUCCAGGG |
| Sense: CCCUGGACAGAUACUUCAA |
| FUT9 | 1003 | Antisense: UAUCAUUGACAUAUUCUCC |
| Sense: GGAGAAUAUGUCAAUGAUA |
| FUT10 | 485 | Antisense: UUGAACAAGGUGAUCACUG |
| Sense: CAGUGAUCACCUUGUUCAA |
